# Supplementary material for: Dual Role of Ribosome-Binding Domain of NAC as a Potent Suppressor of Protein Aggregation and Aging-Related Proteinopathies
Source: PubMed Central journal article supplement — Mol Cell. 2019 May 16;74(4):729–741.e7. doi: 10.1016/j.molcel.2019.03.012 (PMC6527867; doi:10.1016/j.molcel.2019.03.012), 2019-05-16
Supplement: mmc1.pdf [file mmc1.pdf]

**Molecular Cell, Volume 74**

**Supplemental Information**

**Dual Role of Ribosome-Binding Domain of NAC  
as a Potent Suppressor of Protein Aggregation and  
Aging-Related Proteinopathies**

**Koning Shen, Martin Gamerdinger, Rebecca Chan, Karina Gense, Esther M. Martin, Nadine Sachs, Patrick D. Knight, Renate Schlömer, Antonio N. Calabrese, Katie L. Stewart, Lukas Leiendecker, Ankit Baghel, Sheena E. Radford, Judith Frydman, and Elke Deuerling**

**Figure S1**

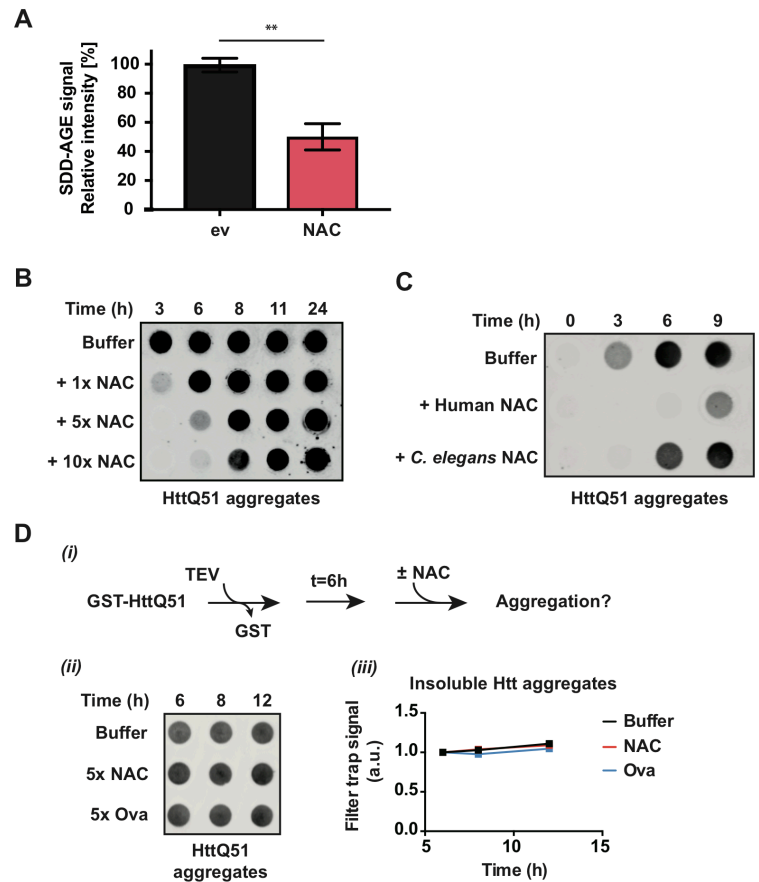

**Figure S1. Aggregation suppression of mutant Huntingtin by NAC. Related to Figure 1.**

(A) Quantification of PolyQ35::YFP signal on SDD-AGE blots as shown in Figure 1B. Data are represented as mean  $\pm$  SEM ( $n = 3$ ). Statistical significance was calculated by Student's *t* test. ev = empty vector.

(B) *In vitro* filter trap aggregation assay of mutant Huntingtin (mHttQ51) incubated with 1x, 5x or 10x molar excess of human NAC. Aggregation of GST-mHttQ51 was initiated by cleavage of the GST tag using the TEV protease. SDS-insoluble aggregates were detected with an S-tag antibody.

(C) Same assay as in (A) but with either human or *C. elegans* NAC added.

(D) (i) Schematic of *in vitro* filter trap aggregation assay of mHttQ51. Experiment was conducted similarly to (A), with the exception of a 6-hour time delay between initiation of aggregation and addition of NAC or Ovalbumin control. (ii) SDS-insoluble aggregates of mHttQ51 after addition of 5x molar excess of NAC or ovalbumin (Ova) control. (iii) Quantification of SDS-insoluble aggregates shown in (ii).

**Figure S2**

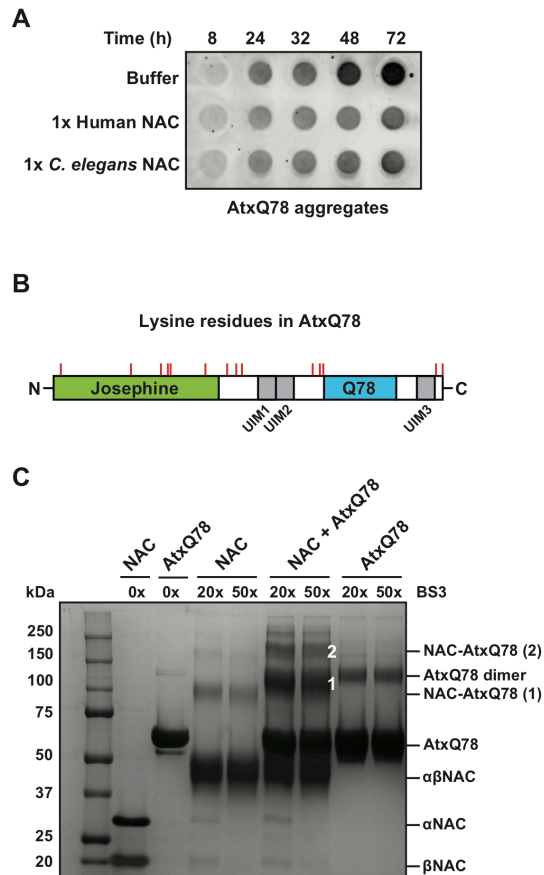

**Figure S2. Interaction of NAC with mutant Ataxin-3. Related to Figure 2.**

(A) Filter trap aggregation assay of AtxQ78 incubated with an equimolar concentration of either human or *C. elegans* NAC at 37°C for the indicated time. SDS-insoluble aggregates were detected with an anti-His antibody.

(B) Schematic showing the domain architecture of Ataxin-3. All lysine residues carrying optimal functional groups for chemical crosslinking with amine-reactive crosslinkers are highlighted in red. Josephine domain, green. PolyQ78 stretch, blue. UIM = ubiquitin interacting motif.

(C) Coomassie-stained Tris-Tricine gel showing crosslinked protein complexes. NAC and AtxQ78 were crosslinked either with 20x or 50x molar excess of BS3 for 1 hour. NAC and AtxQ78 alone were used as controls. New bands labeled with 1 (NAC-AtxQ78 monomer) and 2 (NAC-AtxQ78 dimer) were excised from the gel and subjected to an in-gel digest for the LC-MS analysis shown in Figure 2C.

Figure S3

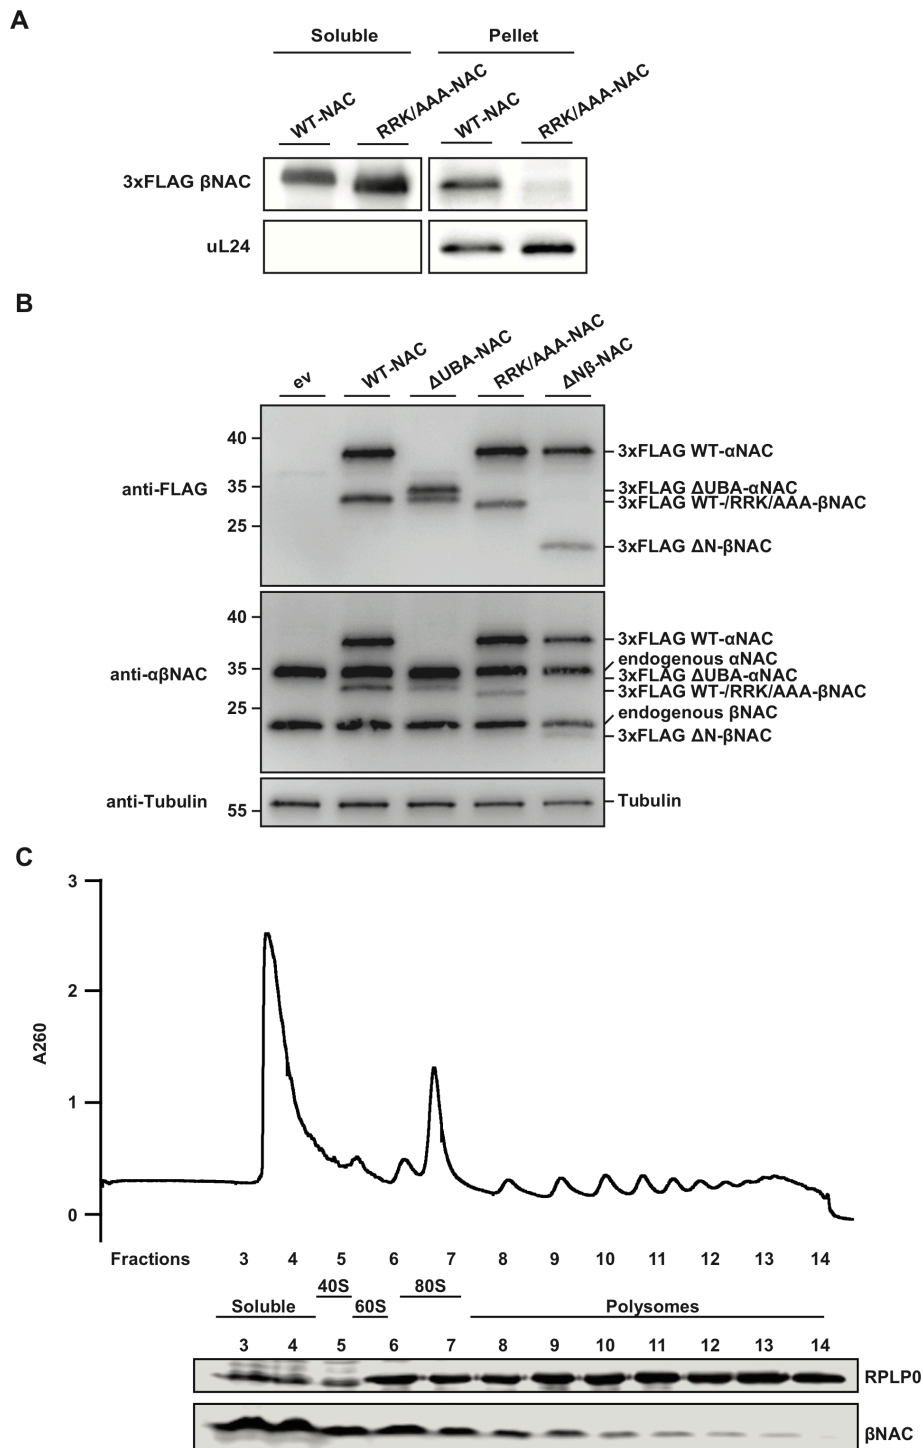

**Figure S3. Association of NAC with ribosomes. Related to Figure 3.**

(A) Sucrose cushion centrifugation of ribosomes in PolyQ35::YFP *C. elegans* worms overexpressing either 3xFLAG-tagged WT- or RRK/AAA-NAC in muscle cells (*myo-3* promoter). Analysis was performed on day 2 of adulthood. Indicated proteins in the supernatant (Soluble) and ribosomal pellet (Pellet) fractions were analyzed by immunoblotting. uL24 served as a ribosomal marker.

(B) Immunoblot analysis of total levels of endogenous NAC (ubiquitous expression) and overexpressed 3xFLAG-tagged NAC variants in body wall muscles in animals investigated in Figure 3C, D. FLAG immunoblot shows only exogenously overexpressed NAC in muscle cells, while the  $\alpha\beta$ NAC immunoblot shows endogenous and exogenous NAC variants, as indicated. Tubulin served as a loading control.

(C) Polysome profile of HEK293T cells.  $\beta$ NAC levels were assessed by immunoblotting. RPLP0 served as a ribosomal marker.

Figure S4

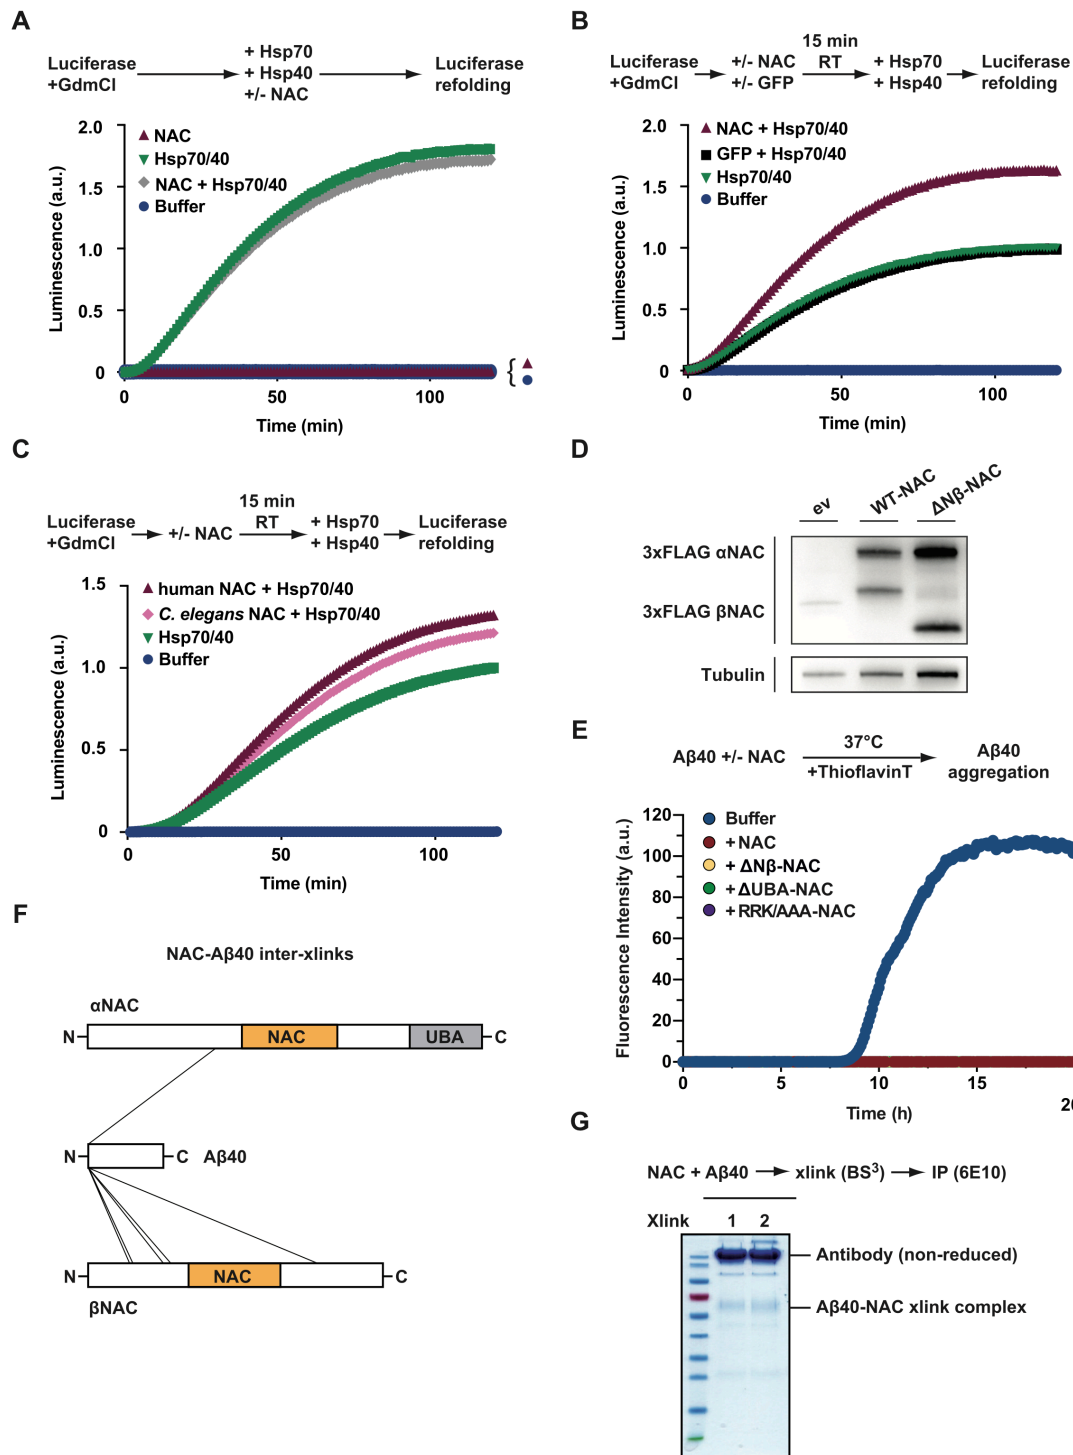

**Figure S4. Chaperone activity of NAC on luciferase and Aβ40. Related to Figure 4.**

(A) *In vitro* luciferase refolding assays using guanidine-HCl (GdmCl)-denatured substrate. Luciferase (0.02 μM) was incubated with an equimolar concentration of human NAC in the presence and absence of an Hsp70/Hsp40 system (3.2 μM/0.8 μM). Luciferase reactivation was analyzed by luminescence recording over two hours at RT using luciferin as a substrate. a.u. = arbitrary units.

(B) Similar assay as in (A) but luciferase was first preincubated with NAC or GFP control in a 1:1 molar ratio for 15 min at room temperature before adding the Hsp70/Hsp40 chaperone system.

(C) Experiment was conducted similarly to (B) but with NAC from both human and *C. elegans*.

(D) Immunoblot analysis of wild-type NAC and ΔNβ-NAC (FLAG-tagged α- and βNAC) overexpressed in FlucDM-EGFP strain. Tubulin served as loading control.

(E) A $\beta$ 40 aggregation (18  $\mu$ M) was examined in the presence of molar equivalent *C. elegans* NAC constructs (18  $\mu$ M) with 10  $\mu$ M thioflavin T (ThT). Samples were incubated quiescently at 37°C for 20 h. Each color indicates replicate assays prepared in the same plate. Aggregation results were baseline subtracted from NAC constructs alone (without A $\beta$ 40) or buffer, which did not show aggregation.

(F) Crosslinked NAC-A $\beta$ 40 complexes from gel shown in (D) were excised and subjected to an in-gel digest and LC-MS analysis. Schematic shows identified intermolecular crosslinks. See also Table S2.

(G) Coomassie-stained gel showing isolated NAC-A $\beta$ 40 complexes crosslinked with BS<sup>3</sup>. NAC and A $\beta$ 40 (both 18  $\mu$ M) were incubated at 37°C for two hours and crosslinked using 20x molar excess of BS3 for 30 min. Crosslinked samples were gel-filtrated and NAC-A $\beta$ 40 complexes immunoprecipitated using A $\beta$ 40 antibody (6E10). Proteins were eluted under non-reducing conditions to avoid antibody splitting into light and heavy chains.

**Figure S5**

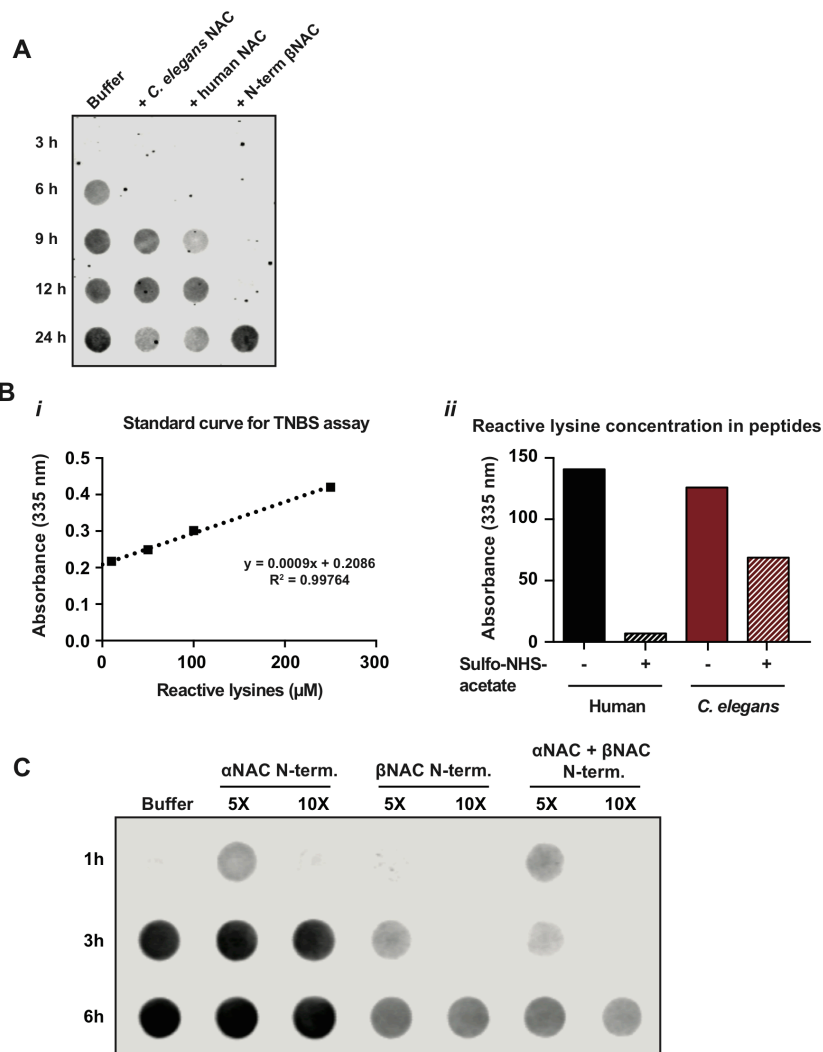

**Figure S5. Suppression of PolyQ aggregation by βNAC N-terminus. Related to Figure 5.**

(A) *In vitro* filter trap aggregation assay of PolyQ51 incubated with 5x molar excess of either *C. elegans* NAC, human NAC or the human N-terminal βNAC peptide. Aggregation of GST-PolyQ51 was initiated by cleavage of the GST tag using the TEV protease. SDS-insoluble aggregates were detected with an S-tag antibody.

(B) Quantification of sulfo-NHS-acetate labeling of lysine residues in βNAC N-terminal peptides using the TNBS assay to assess amount of primary amines. (i) Standard curve of lysine amino acid with 335 nm absorbance levels. (ii) Quantification of primary amine availability with differently treated peptides.

(C) *In vitro* filter trap aggregation assay of mutant Huntingtin (mHttQ51) incubated with 5x or 10x molar excess of human α- or βNAC N-terminal peptides as indicated. SDS-insoluble aggregates were detected with an S-tag antibody.

**Figure S6**

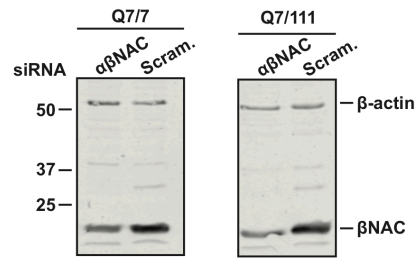

**Figure S6. Knockdown efficiency of NAC in Q7/7 and Q7/111 cell lines. Related to Figure 6.** Western blot showing βNAC knockdown in siRNA-treated cell lines used in viability assay shown in Figure 6A. β-actin was probed simultaneously as a loading control.



**Table S1**

Intra- and intermolecular NAC crosslinks. Related to Figure 2.

| Score | m/z     | z | M+H+     | Calculated | Deviation | Peptide 1                         | Protein 1 | From | To  | Peptide 2              | Protein 2     | From | To  | Site 1 | Site 2 |
|-------|---------|---|----------|------------|-----------|-----------------------------------|-----------|------|-----|------------------------|---------------|------|-----|--------|--------|
| 231   | 594.99  | 3 | 1782.956 | 1782.953   | 1.31      | [QAK]                             | alpha-NAC | 52   | 54  | [VAEAAGLGDHIDK]        | alpha-NAC     | 39   | 51  | K3     | K13    |
| 124   | 593.648 | 3 | 1778.929 | 1778.928   | 0.47      | [VAEAAGLGDHIDKQAK]                | alpha-NAC | 39   | 54  | 0                      | dead-end      | 0    | 0   | K13    | x0     |
| 111   | 1140.91 | 3 | 3420.702 | 3420.686   | 4.87      | [DDGTVIHFNPK]                     | beta-NAC  | 70   | 81  | [VQTSVPANTFVSVTGSADNK] | beta-NAC      | 82   | 100 | K12    | T3     |
| 106   | 464.925 | 3 | 1392.76  | 1392.759   | 0.33      | [KLQAQQEHVR]                      | beta-NAC  | 13   | 22  | 0                      | dead-end      | 0    | 0   | K1     | x0     |
| 95    | 550.95  | 3 | 1650.834 | 1650.837   | -1.49     | [QKEVK]                           | alpha-NAC | 9    | 13  | {MTGSTETR}             | alpha-NAC     | 0    | 8   | K2     | {0     |
| 83    | 817.758 | 3 | 2451.258 | 2451.255   | 1.41      | [IEDLTQHAQMSAIENLKPTR]            | alpha-NAC | 114  | 133 | 0                      | dead-end      | 0    | 0   | K17    | x0     |
| 75    | 711.375 | 3 | 2132.111 | 2132.109   | 0.61      | [VAEAAGLGDHIDKQAKQSR]             | alpha-NAC | 39   | 57  | 1                      | intrapeptidal | 0    | 0   | K13    | K16    |
| 73    | 539.313 | 3 | 1615.926 | 1615.928   | -1.36     | [KKLQAQQEHVR]                     | beta-NAC  | 11   | 22  | 1                      | intrapeptidal | 0    | 0   | K2     | K3     |
| 66    | 823.088 | 3 | 2467.251 | 2467.25    | 0.43      | [IEDLTQHAQmSAIENLKPTR]            | alpha-NAC | 114  | 133 | 0                      | dead-end      | 0    | 0   | K17    | x0     |
| 66    | 640.038 | 3 | 1918.099 | 1918.105   | -2.95     | [SKNILFVINKPDVFK]                 | alpha-NAC | 85   | 99  | 0                      | dead-end      | 0    | 0   | K2     | x0     |
| 61    | 593.647 | 3 | 1778.928 | 1778.928   | -0.37     | [VAEAAGLGDHIDKQAK]                | alpha-NAC | 39   | 54  | 0                      | dead-end      | 0    | 0   | K16    | x0     |
| 57    | 632.037 | 3 | 1894.097 | 1894.101   | -1.82     | [LGLK]                            | alpha-NAC | 69   | 72  | [LANNVTKLPGDGK]        | beta-NAC      | 124  | 136 | K4     | K13    |
| 52    | 551.948 | 3 | 1653.829 | 1653.83    | -0.35     | [VCIRK]                           | alpha-NAC | 80   | 84  | {mTGSTETR}             | alpha-NAC     | 0    | 8   | K5     | {0     |
| 52    | 1139.56 | 3 | 3416.655 | 3416.66    | -1.62     | [DDGTVIHFNPK]                     | beta-NAC  | 70   | 81  | [VQTSVPANTFVSVTGSADNK] | beta-NAC      | 82   | 100 | K12    | T3     |
| 52    | 1139.56 | 3 | 3416.655 | 3416.66    | -1.62     | [DDGTVIHFNPKVQTSVPANTFVSVTGSADNK] | beta-NAC  | 70   | 100 | 0                      | dead-end      | 0    | 0   | K12    | x0     |
| 48    | 676.735 | 3 | 2028.19  | 2028.189   | 0.23      | [KSKNILFVINKPDVFK]                | alpha-NAC | 84   | 99  | 1                      | intrapeptidal | 0    | 0   | K1     | K3     |
| 45    | 602.312 | 3 | 1804.92  | 1804.922   | -0.98     | [IGGKGTPR]                        | beta-NAC  | 23   | 30  | {mTGSTETR}             | alpha-NAC     | 0    | 8   | K4     | {0     |
| 44    | 823.085 | 3 | 2467.241 | 2467.25    | -3.39     | [IEDLTQHAQmSAIENLKPTR]            | alpha-NAC | 114  | 133 | 0                      | dead-end      | 0    | 0   | K17    | x0     |
| 44    | 817.756 | 3 | 2451.254 | 2451.255   | -0.36     | [IEDLTQHAQMSAIENLKPTR]            | alpha-NAC | 114  | 133 | 0                      | dead-end      | 0    | 0   | K17    | x0     |
| 43    | 712.717 | 3 | 2136.136 | 2136.134   | 0.82      | [LPGDGK]                          | beta-NAC  | 131  | 136 | {mMDSKAIARIK}          | beta-NAC      | 0    | 12  | K6     | K12    |
| 42    | 817.758 | 3 | 2451.259 | 2451.255   | 1.59      | [IEDLTQHAQMSAIENLKPTR]            | alpha-NAC | 114  | 133 | 0                      | dead-end      | 0    | 0   | K17    | x0     |
| 37    | 906.168 | 3 | 2716.488 | 2716.495   | -2.73     | [QITEMLPGLNQLGPESLTHLKK]          | beta-NAC  | 101  | 123 | 0                      | dead-end      | 0    | 0   | K23    | x0     |
| 36    | 911.505 | 3 | 2732.502 | 2732.49    | 4.16      | [QITEMLPGLNQLGPESLTHLKK]          | beta-NAC  | 101  | 123 | 0                      | dead-end      | 0    | 0   | K22    | x0     |
| 35    | 433.451 | 5 | 2163.225 | 2163.229   | -2.11     | [IGGKGTPR]                        | beta-NAC  | 23   | 30  | [KLQAQQEHVR]           | beta-NAC      | 13   | 22  | K4     | K1     |
| 35    | 747.379 | 3 | 2240.121 | 2240.131   | -4.09     | [QVTGVSRR]                        | alpha-NAC | 73   | 79  | [DDGTVIHFNPK]          | beta-NAC      | 70   | 81  | S6     | K12    |
| 34    | 607.644 | 3 | 1820.917 | 1820.917   | -0.13     | [IGGKGTPR]                        | beta-NAC  | 23   | 30  | {mTGSTETR}             | alpha-NAC     | 0    | 8   | K4     | T2     |
| 31    | 751.723 | 3 | 2253.153 | 2253.162   | -3.61     | {mTGSTETR}                        | alpha-NAC | 0    | 8   | [QSRSEKKARK]           | alpha-NAC     | 55   | 64  | {0     | K6     |
| 29    | 816.777 | 3 | 2448.317 | 2448.313   | 1.8       | [AIAERIK]                         | beta-NAC  | 6    | 12  | {mTGSTETRQKEVK}        | alpha-NAC     | 0    | 13  | K7     | T2     |
| 28    | 711.375 | 3 | 2132.111 | 2132.109   | 0.83      | [LPGDGK]                          | beta-NAC  | 131  | 136 | {mMDSKAIARIK}          | beta-NAC      | 0    | 12  | K6     | K12    |
| 26    | 556.282 | 3 | 1666.831 | 1666.832   | -0.36     | {mTGSTETRQKEVK}                   | alpha-NAC | 0    | 13  | 0                      | dead-end      | 0    | 0   | T5     | x0     |
| 26    | 772.085 | 3 | 2314.24  | 2314.236   | 1.82      | [QAKQSR]                          | alpha-NAC | 52   | 57  | [DIELVISQANTTR]        | alpha-NAC     | 160  | 172 | K3     | T12    |
| 25    | 772.085 | 3 | 2314.241 | 2314.236   | 2.25      | [QAKQSR]                          | alpha-NAC | 52   | 57  | [DIELVISQANTTR]        | alpha-NAC     | 160  | 172 | K3     | T12    |
| 24    | 978.107 | 3 | 2932.308 | 2932.319   | -3.91     | {mTGSTETR}                        | alpha-NAC | 0    | 8   | [GEDEDVPELVGDFDAASK]   | beta-NAC      | 137  | 154 | S4     | K18    |
| 24    | 691.408 | 3 | 2072.21  | 2072.201   | 4.58      | [IGGK]                            | beta-NAC  | 23   | 26  | [QVTGVSRRVCIRKSK]      | alpha-NAC     | 73   | 86  | K4     | S6     |
| 23    | 691.408 | 3 | 2072.21  | 2072.212   | -0.84     | [KAR]                             | alpha-NAC | 61   | 63  | [QVTGVSRRVCIRKSK]      | alpha-NAC     | 73   | 86  | K1     | S6     |
| 22    | 556.282 | 3 | 1666.831 | 1666.832   | -0.36     | [EVK]                             | alpha-NAC | 11   | 13  | {mTGSTETRQK}           | alpha-NAC     | 0    | 10  | K3     | T5     |
| 21    | 1032.54 | 3 | 3095.601 | 3095.612   | -3.42     | [SEKKARKLFSK]                     | alpha-NAC | 58   | 68  | [EADNDVNAISLTM]        | alpha-NAC     | 181  | 196 | K11    | T14    |
| 20    | 478.29  | 3 | 1432.854 | 1432.852   | 1.2       | [QSR]                             | alpha-NAC | 55   | 57  | [LFSKLGLK]             | alpha-NAC     | 65   | 72  | S2     | K8     |
| 18    | 550.277 | 3 | 1648.815 | 1648.821   | -3.71     | {mTGSTETRQKEVK}                   | alpha-NAC | 0    | 13  | 1                      | intrapeptidal | 0    | 0   | {0     | K10    |
| 18    | 736.346 | 3 | 2207.025 | 2207.029   | -1.93     | {mTGSTETR}                        | alpha-NAC | 0    | 8   | {mmDSKAIARIK}          | beta-NAC      | 0    | 10  | S4     | K5     |
| 160   | 519.74  | 2 | 1038.473 | 1038.477   | -3.73     | {mTGSTETR}                        | alpha-NAC | 0    | 8   | 0                      | dead-end      | 0    | 0   | {0     | x0     |
| 151   | 379.233 | 2 | 757.459  | 757.457    | 2.64      | [NKAIR]                           | alpha-NAC | 173  | 177 | 0                      | dead-end      | 0    | 0   | K2     | x0     |
| 147   | 527.739 | 2 | 1054.472 | 1054.472   | -0.49     | {mTGSTETR}                        | alpha-NAC | 0    | 8   | 0                      | dead-end      | 0    | 0   | {0     | x0     |
| 134   | 471.275 | 2 | 941.543  | 941.541    | 1.56      | [IGGKGTPR]                        | beta-NAC  | 23   | 30  | 0                      | dead-end      | 0    | 0   | K4     | x0     |
| 103   | 473.289 | 2 | 945.57   | 945.567    | 3.43      | [IGGK]                            | beta-NAC  | 23   | 26  | [GTPR]                 | beta-NAC      | 27   | 30  | K4     | T2     |
| 97    | 471.275 | 2 | 941.543  | 941.541    | 1.56      | [IGGK]                            | beta-NAC  | 23   | 26  | [GTPR]                 | beta-NAC      | 27   | 30  | K4     | T2     |
| 96    | 522.308 | 2 | 1043.609 | 1043.609   | 0.18      | [KLANNVTK]                        | beta-NAC  | 123  | 130 | 0                      | dead-end      | 0    | 0   | K1     | x0     |
| 91    | 851.991 | 2 | 1702.974 | 1702.978   | -2.29     | [NILFVINKPDVFK]                   | alpha-NAC | 87   | 99  | 0                      | dead-end      | 0    | 0   | K8     | x0     |
| 90    | 657.393 | 2 | 1313.778 | 1313.779   | -0.76     | [LGLKQVTGVSRR]                    | alpha-NAC | 69   | 79  | 0                      | dead-end      | 0    | 0   | K4     | x0     |

|    |         |   |          |          |       |                                     |           |     |     |                            |               |     |     |     |     |
|----|---------|---|----------|----------|-------|-------------------------------------|-----------|-----|-----|----------------------------|---------------|-----|-----|-----|-----|
| 87 | 540.556 | 4 | 2159.201 | 2159.204 | -1.38 | [IGGKGTPR]                          | beta-NAC  | 23  | 30  | [KLQAQQEHVR]               | beta-NAC      | 13  | 22  | K4  | K1  |
| 87 | 851.993 | 2 | 1702.98  | 1702.978 | 1     | [NILFVINKPDVFK]                     | alpha-NAC | 87  | 99  | 0                          | dead-end      | 0   | 0   | K8  | x0  |
| 55 | 657.393 | 2 | 1313.778 | 1313.779 | -0.76 | [LGLK]                              | >sp alpha | 69  | 72  | [QVTGVSRR]                 | alpha-NAC     | 73  | 79  | K4  | T3  |
| 53 | 389.739 | 2 | 778.47   | 778.471  | -0.92 | [KLFSK]                             | alpha-NAC | 64  | 68  | 0                          | dead-end      | 0   | 0   | K1  | x0  |
| 52 | 659.405 | 2 | 1317.803 | 1317.804 | -0.69 | [LGLK]                              | alpha-NAC | 69  | 72  | [QVTGVSRR]                 | alpha-NAC     | 73  | 79  | K4  | T3  |
| 48 | 891.98  | 2 | 1782.952 | 1782.953 | -0.89 | [QAK]                               | alpha-NAC | 52  | 54  | [VAEAAGLGDHIDK]            | alpha-NAC     | 39  | 51  | K3  | K13 |
| 47 | 541.561 | 4 | 2163.222 | 2163.229 | -3.56 | [IGGKGTPR]                          | beta-NAC  | 23  | 30  | [KLQAQQEHVR]               | beta-NAC      | 13  | 22  | K4  | K1  |
| 45 | 855.928 | 4 | 3420.689 | 3420.686 | 1.03  | [DDGTVIHFNNPK]                      | beta-NAC  | 70  | 81  | [VQTSPANTFVSVTGSADNK]      | beta-NAC      | 82  | 100 | K12 | T3  |
| 42 | 586.376 | 2 | 1171.745 | 1171.745 | -0.33 | [KLFSKLGK]                          | alpha-NAC | 64  | 72  | 1                          | intrapeptidal | 0   | 0   | K1  | K5  |
| 41 | 473.287 | 2 | 945.567  | 945.567  | 0.66  | [IGGK]                              | beta-NAC  | 23  | 26  | [GTPR]                     | beta-NAC      | 27  | 30  | K4  | T2  |
| 40 | 783.872 | 2 | 1566.736 | 1566.743 | -4.55 | [NETK]                              | beta-NAC  | 155 | 158 | [NETKADEQ]                 | beta-NAC      | 155 | 163 | K4  | T3  |
| 36 | 433.452 | 5 | 2163.233 | 2163.229 | 1.42  | [IGGKGTPR]                          | beta-NAC  | 23  | 30  | [KLQAQQEHVR]               | beta-NAC      | 13  | 22  | K4  | K1  |
| 29 | 480.293 | 2 | 959.579  | 959.577  | 2.02  | [ALK]                               | alpha-NAC | 178 | 180 | [SEKK]                     | alpha-NAC     | 58  | 61  | K3  | K3  |
| 29 | 983.996 | 4 | 3932.961 | 3932.959 | 0.6   | [SPGSDTYIFGEAKIEDLTQHAQmSAIENLKPTR] | alpha-NAC | 100 | 133 | 0                          | dead-end      | 0   | 0   | T6  | x0  |
| 28 | 796.984 | 2 | 1592.96  | 1592.964 | -2.72 | [VCIRK]                             | alpha-NAC | 80  | 84  | [VCIRKSK]                  | alpha-NAC     | 80  | 86  | K5  | K7  |
| 24 | 562.291 | 5 | 2807.424 | 2807.428 | -1.29 | {MmDSKAIER}                         | beta-NAC  | 0   | 10  | [TAAADDDKKLQSNLK]          | beta-NAC      | 39  | 52  | {0} | K8  |
| 24 | 839.19  | 4 | 3353.737 | 3353.741 | -1.17 | {KKVIHK}                            | beta-NAC  | 33  | 38  | [LPGDQKGEDEDVPELVGDFDAASK] | beta-NAC      | 131 | 154 | K2  | K6  |
| 23 | 562.291 | 5 | 2807.424 | 2807.428 | -1.29 | {mMDSKAIER}                         | beta-NAC  | 0   | 10  | [TAAADDDKKLQSNLK]          | beta-NAC      | 39  | 52  | {0} | K8  |
| 22 | 983.994 | 4 | 3932.954 | 3932.959 | -1.23 | [SPGSDTYIFGEAKIEDLTQHAQmSAIENLKPTR] | alpha-NAC | 100 | 133 | 0                          | dead-end      | 0   | 0   | Y7  | x0  |

### Intermolecular AtxQ78-NAC crosslinks.

| Score | m/z      | z | M+H+     | Calculated | Deviation | Peptide 1          | Protein 1 | From | To  | Peptide 2                       | Protein 2 | From | To  | Site 1 | Site 2 |
|-------|----------|---|----------|------------|-----------|--------------------|-----------|------|-----|---------------------------------|-----------|------|-----|--------|--------|
| 45    | 632.035  | 3 | 1894.091 | 1894.084   | 3.54      | [RKKK]             | beta-NAC  | 31   | 34  | [AIQLSmQGSSR]                   | Atx3 78Q  | 269  | 279 | K3     | S5     |
| 38    | 1026.208 | 3 | 3076.609 | 3076.594   | 4.83      | [LGLK]             | alpha-NAC | 69   | 72  | [NISQDMTQTSGTNTLSEELRKR]        | Atx3 78Q  | 280  | 301 | K4     | S3     |
| 31    | 1158.192 | 3 | 3472.563 | 3472.554   | 2.37      | [VQQmHRPK]         | Atx3 78Q  | 200  | 207 | [TVEEDENEDVEEDSTGIEEK]          | alpha-NAC | 140  | 159 | K8     | K20    |
| 25    | 772.085  | 3 | 2314.24  | 2314.245   | -2.09     | [SEKKAR]           | alpha-NAC | 58   | 63  | [REAYFEKQQQK]                   | Atx3 78Q  | 302  | 312 | K3     | K7     |
| 25    | 767.06   | 3 | 2299.167 | 2299.165   | 0.86      | [VQQMHRPK]         | Atx3 78Q  | 200  | 207 | {MTGSTETRQK}                    | alpha-NAC | 0    | 10  | K8     | T7     |
| 21    | 790.709  | 3 | 2370.111 | 2370.11    | 0.57      | [NETKADEQ]         | beta-NAC  | 155  | 163 | [EAYFEKQQQK]                    | Atx3 78Q  | 303  | 312 | K4     | K6     |
| 15    | 770.747  | 3 | 2310.227 | 2310.22    | 3.02      | [SEKKAR]           | alpha-NAC | 58   | 63  | [REAYFEKQQQK]                   | Atx3 78Q  | 302  | 312 | K4     | Y4     |
| 13    | 772.085  | 3 | 2314.241 | 2314.245   | -1.65     | [SEKKAR]           | alpha-NAC | 58   | 63  | [REAYFEKQQQK]                   | Atx3 78Q  | 302  | 312 | K4     | K11    |
| 47    | 1066.949 | 5 | 5330.716 | 5330.718   | -0.39     | [LSVTNIPGIEEVNMIK] | beta-NAC  | 54   | 69  | [NISQDMTQTSGTNTLSEELRKRREAYFEK] | Atx3 78Q  | 280  | 308 | K16    | K29    |
| 36    | 777.121  | 4 | 3105.46  | 3105.469   | -2.73     | {MMDSK}            | beta-NAC  | 0    | 5   | [NISQDMTQTSGTNTLSEELRK]         | Atx3 78Q  | 280  | 300 | {0}    | T7     |
| 35    | 777.121  | 4 | 3105.463 | 3105.469   | -1.7      | {MMDSK}            | beta-NAC  | 0    | 5   | [NISQDMTQTSGTNTLSEELRK]         | Atx3 78Q  | 280  | 300 | {0}    | S3     |
| 32    | 539.817  | 2 | 1078.628 | 1078.629   | -1.58     | [EVK]              | alpha-NAC | 11   | 13  | [TEGKK]                         | Atx3 78Q  | 438  | 443 | K3     | K5     |
| 27    | 667.123  | 4 | 2665.471 | 2665.483   | -4.83     | [IGGKGTPR]         | beta-NAC  | 23   | 30  | [KRREAYFEKQQQK]                 | Atx3 78Q  | 300  | 312 | T6     | K1     |
| 24    | 1020.487 | 4 | 4078.928 | 4078.946   | -4.37     | [QAKQSR]           | alpha-NAC | 52   | 57  | {SYHHHHHHLENLYFQGMESIFHEK}      | Atx3 78Q  | 0    | 25  | K3     | K25    |
| 20    | 667.123  | 4 | 2665.471 | 2665.483   | -4.83     | [IGGKGTPRRK]       | beta-NAC  | 23   | 32  | [REAYFEKQQQK]                   | Atx3 78Q  | 302  | 312 | T6     | K11    |
| 19    | 791.134  | 4 | 3161.513 | 3161.52    | -2.25     | [IGGKGTPR]         | beta-NAC  | 23   | 30  | [VLEANDGSGMLDEDEEDLQR]          | Atx3 78Q  | 229  | 248 | K4     | S8     |
| 19    | 837.673  | 4 | 3347.669 | 3347.677   | -2.16     | [QAK]              | alpha-NAC | 52   | 54  | [TFLQQPSGNmDDSGFFSIQVISNALK]    | Atx3 78Q  | 77   | 102 | K3     | S17    |
| 18    | 837.675  | 4 | 3347.679 | 3347.677   | 0.75      | [QAK]              | alpha-NAC | 52   | 54  | [TFLQQPSGNmDDSGFFSIQVISNALK]    | Atx3 78Q  | 77   | 102 | K3     | S22    |

Intramolecular AtxQ78 crosslinks.

| Score | m/z    | z | M+H+   | Calculated | Deviation | Peptide 1             | Protein 1 | From | To  | Peptide 2        | Protein 2     | From | To  | Site 1 | Site 2 |
|-------|--------|---|--------|------------|-----------|-----------------------|-----------|------|-----|------------------|---------------|------|-----|--------|--------|
| 106   | 561.65 | 3 | 1682.9 | 1682.932   | -2.25     | [LIGEELAQLKEQR]       | Atx3 78Q  | 208  | 220 | 0                | dead-end      | 0    | 0   | K10    | x0     |
| 61    | 385.21 | 3 | 1153.6 | 1153.621   | 2.17      | [VHKTDLER]            | Atx3 78Q  | 221  | 228 | 0                | dead-end      | 0    | 0   | K3     | x0     |
| 54    | 799.71 | 3 | 2397.1 | 2397.109   | 0.61      | [NISQDMTQTSGLTSEELR]  | Atx3 78Q  | 280  | 299 | 0                | dead-end      | 0    | 0   | S10    | x0     |
| 42    | 398.23 | 3 | 1192.7 | 1192.672   | -1.01     | [NDLK]                | Atx3 78Q  | 434  | 437 | [TEGKK]          | Atx3 78Q      | 438  | 443 | K4     | T1     |
| 38    | 385.21 | 3 | 1153.6 | 1153.621   | 2.17      | [VHK]                 | Atx3 78Q  | 221  | 223 | [TDLER]          | Atx3 78Q      | 224  | 228 | K3     | T1     |
| 37    | 396.89 | 3 | 1188.6 | 1188.647   | -0.25     | [NDLKTEGKK]           | Atx3 78Q  | 434  | 443 | 0                | dead-end      | 0    | 0   | K4     | x0     |
| 30    | 396.89 | 3 | 1188.6 | 1188.647   | -0.25     | [NDLK]                | Atx3 78Q  | 434  | 437 | [TEGKK]          | Atx3 78Q      | 438  | 443 | K4     | T1     |
| 30    | 794.38 | 3 | 2381.1 | 2381.114   | 3.94      | [NISQDMTQTSGLTSEELR]  | Atx3 78Q  | 280  | 299 | 0                | dead-end      | 0    | 0   | T12    | x0     |
| 27    | 500.62 | 3 | 1499.8 | 1499.848   | -0.92     | [TEGKK]               | Atx3 78Q  | 438  | 443 | [EQRVHK]         | Atx3 78Q      | 218  | 223 | K5     | K6     |
| 25    | 767.06 | 3 | 2299.2 | 2299.165   | 0.86      | [VQQMHRPK]            | Atx3 78Q  | 200  | 207 | {MTGSTETRQK}     | alpha-NAC     | 0    | 10  | K8     | T7     |
| 22    | 398.23 | 3 | 1192.7 | 1192.672   | 0.1       | [NDLK]                | Atx3 78Q  | 434  | 437 | [TEGKK]          | Atx3 78Q      | 438  | 443 | K4     | K5     |
| 18    | 379.21 | 3 | 1135.6 | 1135.611   | 2.42      | [VHKTDLER]            | Atx3 78Q  | 221  | 228 | 1                | intrapeptidal | 0    | 0   | K3     | T4     |
| 17    | 386.55 | 3 | 1157.6 | 1157.646   | -2.97     | [VHK]                 | Atx3 78Q  | 221  | 223 | [TDLER]          | Atx3 78Q      | 224  | 228 | K3     | T1     |
| 115   | 577.31 | 2 | 1153.6 | 1153.621   | -0.66     | [VHKTDLER]            | Atx3 78Q  | 221  | 228 | 0                | dead-end      | 0    | 0   | K3     | x0     |
| 91    | 577.31 | 2 | 1153.6 | 1153.621   | -0.66     | [VHK]                 | Atx3 78Q  | 221  | 223 | [TDLER]          | Atx3 78Q      | 224  | 228 | K3     | T1     |
| 83    | 735.83 | 2 | 1470.6 | 1470.642   | 0.38      | [MAEGGVTSSEYR]        | Atx3 78Q  | 65   | 76  | 0                | dead-end      | 0    | 0   | S8     | x0     |
| 77    | 735.83 | 2 | 1470.6 | 1470.642   | 1.24      | [MAEGGVTSSEYR]        | Atx3 78Q  | 65   | 76  | 0                | dead-end      | 0    | 0   | Y11    | x0     |
| 75    | 841.97 | 2 | 1682.9 | 1682.932   | 0         | [LIGEELAQLKEQR]       | Atx3 78Q  | 208  | 220 | 0                | dead-end      | 0    | 0   | K10    | x0     |
| 74    | 585.82 | 2 | 1170.6 | 1170.636   | 0.98      | [NDLKTEGKK]           | Atx3 78Q  | 434  | 443 | 1                | intrapeptidal | 0    | 0   | K4     | K8     |
| 73    | 667.12 | 4 | 2665.5 | 2665.482   | -4.33     | [VHKTDLER]            | Atx3 78Q  | 221  | 228 | [LIGEELAQLKEQR]  | Atx3 78Q      | 208  | 220 | T4     | K10    |
| 71    | 743.82 | 2 | 1486.6 | 1486.637   | -0.46     | [mAEAGGVTSSEYR]       | Atx3 78Q  | 65   | 76  | 0                | dead-end      | 0    | 0   | S8     | x0     |
| 70    | 573.32 | 4 | 2290.3 | 2290.259   | -0.26     | [VQQMHRPKLIGEELAQLK]  | Atx3 78Q  | 200  | 217 | 0                | dead-end      | 0    | 0   | K8     | x0     |
| 64    | 585.82 | 2 | 1170.6 | 1170.636   | -1.5      | [NDLKTEGKK]           | Atx3 78Q  | 434  | 443 | 1                | intrapeptidal | 0    | 0   | K8     | T5     |
| 62    | 569.32 | 4 | 2274.3 | 2274.264   | 1.02      | [VQQMHRPKLIGEELAQLK]  | Atx3 78Q  | 200  | 217 | 0                | dead-end      | 0    | 0   | K8     | x0     |
| 50    | 596.84 | 2 | 1192.7 | 1192.672   | -2.71     | [NDLK]                | Atx3 78Q  | 434  | 437 | [TEGKK]          | Atx3 78Q      | 438  | 443 | K4     | T1     |
| 50    | 667.12 | 4 | 2665.5 | 2665.482   | -4.33     | [TDLER]               | Atx3 78Q  | 224  | 228 | LIGEELAQLKEQRVHK | Atx3 78Q      | 208  | 223 | T1     | K16    |
| 49    | 579.33 | 2 | 1157.6 | 1157.646   | -0.73     | [VHK]                 | Atx3 78Q  | 221  | 223 | [TDLER]          | Atx3 78Q      | 224  | 228 | K3     | T1     |
| 49    | 667.12 | 4 | 2665.5 | 2665.482   | -4.33     | [LIGEELAQLK]          | Atx3 78Q  | 208  | 217 | [EQRVHKTDLER]    | Atx3 78Q      | 218  | 228 | K10    | T7     |
| 44    | 666.12 | 4 | 2661.4 | 2661.457   | -3.24     | LIGEELAQLKEQRVHKTDLER | Atx3 78Q  | 208  | 228 | 0                | dead-end      | 0    | 0   | T17    | x0     |
| 43    | 666.12 | 4 | 2661.4 | 2661.457   | -3.24     | [TDLER]               | Atx3 78Q  | 224  | 228 | LIGEELAQLKEQRVHK | Atx3 78Q      | 208  | 223 | T1     | K16    |
| 43    | 666.12 | 4 | 2661.4 | 2661.457   | -3.24     | [VHKTDLER]            | Atx3 78Q  | 221  | 228 | [LIGEELAQLKEQR]  | Atx3 78Q      | 208  | 220 | T4     | K10    |
| 42    | 666.12 | 4 | 2661.4 | 2661.457   | -3.24     | [LIGEELAQLK]          | Atx3 78Q  | 208  | 217 | [EQRVHKTDLER]    | Atx3 78Q      | 218  | 228 | K10    | T7     |
| 40    | 727.86 | 2 | 1454.7 | 1454.716   | -0.8      | [EAYFEKQQQK]          | Atx3 78Q  | 303  | 312 | 0                | dead-end      | 0    | 0   | K6     | x0     |
| 39    | 729.87 | 2 | 1458.7 | 1458.741   | -3.95     | [QQQK]                | Atx3 78Q  | 309  | 312 | [EAYFEK]         | Atx3 78Q      | 303  | 308 | K4     | K6     |
| 36    | 743.82 | 2 | 1486.6 | 1486.637   | 1.5       | [mAEAGGVTSSEYR]       | Atx3 78Q  | 65   | 76  | 0                | dead-end      | 0    | 0   | S8     | x0     |
| 32    | 727.86 | 2 | 1454.7 | 1454.716   | -0.8      | [QQQK]                | Atx3 78Q  | 309  | 312 | [EAYFEK]         | Atx3 78Q      | 303  | 308 | K4     | K6     |
| 27    | 675.34 | 2 | 1349.7 | 1349.673   | 0.79      | [AIQLSmQGSSR]         | Atx3 78Q  | 269  | 279 | 0                | dead-end      | 0    | 0   | S10    | x0     |
| 27    | 667.34 | 2 | 1333.7 | 1333.678   | -1.88     | [AIQLSMQGSSR]         | Atx3 78Q  | 269  | 279 | 0                | dead-end      | 0    | 0   | S10    | x0     |
| 22    | 475.51 | 4 | 1899   | 1899.038   | -1.93     | [KRR]                 | Atx3 78Q  | 300  | 302 | [EAYFEKQQQK]     | Atx3 78Q      | 303  | 312 | K1     | K6     |

**Table S2**Intra- and intermolecular NAC/A $\beta$ 40 crosslinks. Related to Figure 4 and Figure S4.

| Score | m/z      | z | M+H+     | Calculated | Deviation | Peptide 1                                    | Protein 1 | From | To  | Peptide2                        | Protein 2     | From | To  | Site 1 | Site 2 |
|-------|----------|---|----------|------------|-----------|----------------------------------------------|-----------|------|-----|---------------------------------|---------------|------|-----|--------|--------|
| 231   | 756.419  | 2 | 1511.831 | 1511.832   | -0.68     | [LAEALPKQSVDGK]                              | beta-NAC  | 121  | 133 | 0                               | dead-end      | 0    | 0   | K7     | x0     |
| 175   | 730.889  | 2 | 1460.770 | 1460.767   | 2.48      | [ETIMNQEKLAK]                                | beta-NAC  | 3    | 13  | 0                               | dead-end      | 0    | 0   | K8     | x0     |
| 169   | 512.315  | 3 | 1534.931 | 1534.918   | 8.75      | [KVVHR]                                      | beta-NAC  | 31   | 35  | [IGGKG TAR]                     | beta-NAC      | 20   | 27  | K1     | K4     |
| 169   | 1149.282 | 4 | 4594.107 | 4594.148   | -8.90     | [LAEALPKQSVDGKAPLATGEDDDDEVPDLVENFDEASKNEAN] | beta-NAC  | 121  | 163 | 1                               | intrapeptidal | 0    | 0   | K7     | K13    |
| 164   | 1156.810 | 4 | 4624.217 | 4624.234   | -3.72     | [LAEALPKQSVDGK]                              | beta-NAC  | 121  | 133 | [APLATGEDDDDEVPDLVENFDEASKNEAN] | beta-NAC      | 134  | 163 | K7     | T5     |
| 161   | 495.954  | 3 | 1485.848 | 1485.850   | -0.84     | [AKQSR]                                      | alpha-NAC | 67   | 71  | [IGGKG TAR]                     | beta-NAC      | 20   | 27  | K2     | K4     |
| 159   | 571.341  | 2 | 1141.675 | 1141.676   | -0.75     | [KAMSKLGLR]                                  | alpha-NAC | 78   | 86  | 1                               | intrapeptidal | 0    | 0   | K5     | S4     |
| 156   | 539.954  | 3 | 1617.848 | 1617.844   | 2.63      | [TATADDK]                                    | beta-NAC  | 36   | 42  | [IGGKG TAR]                     | beta-NAC      | 20   | 27  | T1     | K4     |
| 151   | 452.790  | 2 | 904.572  | 904.573    | -0.50     | [KKVVHR]                                     | beta-NAC  | 30   | 35  | 1                               | intrapeptidal | 0    | 0   | K1     | K2     |
| 151   | 1153.795 | 4 | 4612.157 | 4612.158   | -0.32     | [LAEALPKQSVDGKAPLATGEDDDDEVPDLVENFDEASKNEAN] | beta-NAC  | 121  | 163 | 0                               | dead-end      | 0    | 0   | K13    | x0     |
| 150   | 1156.808 | 4 | 4624.211 | 4624.234   | -4.84     | [LAEALPKQSVDGK]                              | beta-NAC  | 121  | 133 | [APLATGEDDDDEVPDLVENFDEASKNEAN] | beta-NAC      | 134  | 163 | K7     | T5     |
| 148   | 458.268  | 2 | 915.528  | 915.526    | 2.40      | [IGGKG TAR]                                  | beta-NAC  | 20   | 27  | 0                               | dead-end      | 0    | 0   | K4     | x0     |
| 147   | 852.463  | 2 | 1703.919 | 1703.921   | -1.23     | [TATADDKLQFSLK]                              | beta-NAC  | 36   | 49  | 1                               | intrapeptidal | 0    | 0   | K7     | K8     |
| 145   | 1092.481 | 3 | 3275.428 | 3275.423   | 1.27      | [APLATGEDDDDEVPDLVENFDEASKNEAN]              | beta-NAC  | 134  | 163 | 0                               | dead-end      | 0    | 0   | S24    | x0     |
| 140   | 503.259  | 2 | 1005.511 | 1005.510   | 1.43      | [TATADDKK]                                   | beta-NAC  | 36   | 43  | 0                               | dead-end      | 0    | 0   | K7     | x0     |
| 136   | 559.643  | 3 | 1676.914 | 1676.918   | -2.10     | [IGGKG TAR]                                  | beta-NAC  | 20   | 27  | {MDAEFR}                        | Abeta40       | 0    | 6   | K4     | {0}    |

|     |         |   |          |          |       |                    |           |     |     |                   |               |     |     |    |    |
|-----|---------|---|----------|----------|-------|--------------------|-----------|-----|-----|-------------------|---------------|-----|-----|----|----|
| 135 | 677.733 | 3 | 2031.186 | 2031.189 | -1.59 | [KSKNILFVITKPDVYK] | alpha-NAC | 98  | 113 | 1                 | intrapeptidal | 0   | 0   | K1 | K3 |
| 134 | 499.607 | 3 | 1496.807 | 1496.807 | -0.07 | [KVVHR]            | beta-NAC  | 31  | 35  | [TATADDK]         | beta-NAC      | 36  | 42  | K1 | T1 |
| 134 | 397.748 | 2 | 794.489  | 794.488  | 0.59  | [KVVHR]            | beta-NAC  | 31  | 35  | 0                 | dead-end      | 0   | 0   | K1 | x0 |
| 133 | 462.710 | 2 | 924.413  | 924.413  | -0.35 | {MDAEFR}           | Abeta40   | 0   | 6   | 0                 | dead-end      | 0   | 0   | {0 | x0 |
| 132 | 502.942 | 3 | 1506.812 | 1506.812 | -0.26 | [AKQSR]            | alpha-NAC | 67  | 71  | {MDAEFR}          | Abeta40       | 0   | 6   | K2 | {0 |
| 131 | 512.311 | 3 | 1534.919 | 1534.918 | 0.62  | [KVVHR]            | beta-NAC  | 31  | 35  | [IGGKG TAR]       | beta-NAC      | 20  | 27  | K1 | K4 |
| 124 | 566.839 | 4 | 2264.333 | 2264.336 | -1.42 | [IGGKG TAR]        | beta-NAC  | 20  | 27  | [LAEALPKQSV D GK] | beta-NAC      | 121 | 133 | K4 | K7 |
| 123 | 510.309 | 2 | 1019.611 | 1019.614 | -2.62 | [KLQFSLK]          | beta-NAC  | 43  | 49  | 0                 | dead-end      | 0   | 0   | K1 | x0 |
| 117 | 543.977 | 3 | 1629.917 | 1629.920 | -1.54 | [TATADDK]          | beta-NAC  | 36  | 42  | [IGGKG TAR]       | beta-NAC      | 20  | 27  | T1 | K4 |
| 113 | 555.619 | 3 | 1664.842 | 1664.842 | -0.08 | [IGGKG TAR]        | beta-NAC  | 20  | 27  | {MDAEFR}          | Abeta40       | 0   | 6   | K4 | {0 |
| 112 | 563.821 | 4 | 2252.263 | 2252.261 | 0.93  | [IGGKG TAR]        | beta-NAC  | 20  | 27  | [LAEALPKQSV D GK] | beta-NAC      | 121 | 133 | K4 | K7 |
| 111 | 503.630 | 3 | 1508.877 | 1508.882 | -3.58 | [KVVHR]            | beta-NAC  | 31  | 35  | [TATADDK]         | beta-NAC      | 36  | 42  | K1 | T1 |
| 111 | 470.707 | 2 | 940.406  | 940.408  | -1.74 | {mDAEFR}           | Abeta40   | 0   | 6   | 0                 | dead-end      | 0   | 0   | {0 | x0 |
| 108 | 579.340 | 2 | 1157.672 | 1157.671 | 0.55  | [KAmSKLGLR]        | alpha-NAC | 78  | 86  | 1                 | intrapeptidal | 0   | 0   | K5 | S4 |
| 100 | 582.651 | 3 | 1745.937 | 1745.939 | -1.29 | [IGGKG TAR]        | beta-NAC  | 20  | 27  | [TATADDK K]       | beta-NAC      | 36  | 43  | K4 | K7 |
| 98  | 384.484 | 4 | 1534.913 | 1534.918 | -3.19 | [KVVHR]            | beta-NAC  | 31  | 35  | [IGGKG TAR]       | beta-NAC      | 20  | 27  | K1 | K4 |
| 96  | 406.979 | 4 | 1624.893 | 1624.902 | -5.12 | [KVVHR]            | beta-NAC  | 31  | 35  | [TATADDK K]       | beta-NAC      | 36  | 43  | K1 | T1 |
| 96  | 499.980 | 3 | 1497.926 | 1497.925 | 0.87  | [AKQSR]            | alpha-NAC | 67  | 71  | [IGGKG TAR]       | beta-NAC      | 20  | 27  | K2 | K4 |
| 93  | 586.676 | 3 | 1758.014 | 1758.015 | -0.10 | [IGGKG TAR]        | beta-NAC  | 20  | 27  | [TATADDK K]       | beta-NAC      | 36  | 43  | K4 | K7 |
| 93  | 350.721 | 2 | 700.434  | 700.435  | -1.97 | [AKAVR]            | alpha-NAC | 193 | 197 | 0                 | dead-end      | 0   | 0   | K2 | x0 |

|     |          |   |          |          |       |                |           |     |     |                            |               |     |     |    |    |
|-----|----------|---|----------|----------|-------|----------------|-----------|-----|-----|----------------------------|---------------|-----|-----|----|----|
| 91  | 578.672  | 3 | 1734.001 | 1734.007 | -3.49 | [LQFSLK]       | beta-NAC  | 44  | 49  | [TATADKK]                  | beta-NAC      | 36  | 43  | S4 | K7 |
| 91  | 574.651  | 3 | 1721.938 | 1721.932 | 3.64  | [TATADKK]      | beta-NAC  | 36  | 42  | [LQFSLK]                   | beta-NAC      | 44  | 50  | T3 | K6 |
| 88  | 449.262  | 2 | 897.517  | 897.515  | 2.32  | [IGGKTAR]      | beta-NAC  | 20  | 27  | 1                          | intrapeptidal | 0   | 0   | K4 | T6 |
| 73  | 360.702  | 2 | 720.397  | 720.396  | 0.95  | [KAMSK]        | alpha-NAC | 78  | 82  | 0                          | dead-end      | 0   | 0   | K1 | x0 |
| 71  | 542.304  | 3 | 1624.898 | 1624.902 | -2.13 | [KVVHR]        | beta-NAC  | 31  | 35  | [TATADKK]                  | beta-NAC      | 36  | 43  | K1 | K7 |
| 70  | 544.656  | 3 | 1631.954 | 1631.948 | 3.52  | [LQFSLK]       | beta-NAC  | 44  | 49  | [IGGKTAR]                  | beta-NAC      | 20  | 27  | S4 | K4 |
| 66  | 861.468  | 2 | 1721.929 | 1721.932 | -1.67 | [LQFSLK]       | beta-NAC  | 44  | 49  | [TATADKK]                  | beta-NAC      | 36  | 43  | S4 | K7 |
| 57  | 554.072  | 4 | 2213.267 | 2213.271 | -1.76 | [IGGKTAR]      | beta-NAC  | 20  | 27  | [ETIMNQEKLAK]              | beta-NAC      | 3   | 13  | K4 | K8 |
| 51  | 820.919  | 2 | 1640.830 | 1640.835 | -3.01 | [LQFSLK]       | beta-NAC  | 44  | 49  | {MDAEFR}                   | Abeta40       | 0   | 6   | S4 | {0 |
| 42  | 446.264  | 2 | 891.521  | 891.519  | 3.15  | [LQFSLK]       | beta-NAC  | 44  | 49  | 0                          | dead-end      | 0   | 0   | S4 | x0 |
| 69  | 384.485  | 4 | 1534.917 | 1534.918 | -0.32 | [KVVHR]        | beta-NAC  | 31  | 35  | [IGGKTAR]                  | beta-NAC      | 20  | 27  | K1 | K4 |
| 117 | 543.979  | 3 | 1629.923 | 1629.920 | 2.23  | [TATADKK]      | beta-NAC  | 36  | 42  | [IGGKTAR]                  | beta-NAC      | 20  | 27  | T1 | K4 |
| 68  | 563.821  | 4 | 2252.261 | 2252.261 | -0.13 | [IGGKTAR]      | beta-NAC  | 20  | 27  | [LAEALPKQSVGK]             | beta-NAC      | 121 | 133 | K4 | K7 |
| 82  | 559.643  | 3 | 1676.913 | 1676.918 | -2.64 | [IGGKTAR]      | beta-NAC  | 20  | 27  | {MDAEFR}                   | Abeta40       | 0   | 6   | K4 | {0 |
| 112 | 555.622  | 3 | 1664.851 | 1664.842 | 4.98  | [IGGKTAR]      | beta-NAC  | 20  | 27  | {MDAEFR}                   | Abeta40       | 0   | 6   | K4 | {0 |
| 80  | 1049.776 | 4 | 4196.082 | 4196.068 | 3.33  | [LAEALPKQSVGK] | beta-NAC  | 121 | 133 | [APLATGEDDDDEVDLLENFDEASK] | beta-NAC      | 134 | 158 | K7 | T5 |

**Table S3***C. elegans* strains. Related to STAR Methods.

|        |                                                                                                                                                                                                                                                     |
|--------|-----------------------------------------------------------------------------------------------------------------------------------------------------------------------------------------------------------------------------------------------------|
| DEU117 | rmls132 [ <i>unc-54p::Q35::YFP</i> ]; gamEx17 [ <i>myo-3p::empty::unc-54 3'UTR</i> (50 ng/μl), <i>myo-2p::mCherry::unc-54 3'UTR</i> (2.5 ng/μl), DNA ladder (100 ng/μl)]                                                                            |
| DEU118 | rmls132 [ <i>unc-54p::Q35::YFP</i> ]; gamEx18 [ <i>myo-3p::3xFLAG::αNAC::unc-54 3'UTR</i> (25 ng/μl), <i>myo-3p::3xFLAG::βNAC::unc-54 3'UTR</i> (25 ng/μl), <i>myo-2p::mCherry::unc-54 3'UTR</i> (2.5 ng/μl), DNA ladder (100 ng/μl)]               |
| DEU119 | rmls132 [ <i>unc-54p::Q35::YFP</i> ]; gamEx19 [ <i>myo-3p::3xFLAG::ΔUBA-αNAC::unc-54 3'UTR</i> (25 ng/μl), <i>myo-3p::3xFLAG::βNAC::unc-54 3'UTR</i> (25 ng/μl), <i>myo-2p::mCherry::unc-54 3'UTR</i> (2.5 ng/μl), DNA ladder (100 ng/μl)]          |
| DEU120 | rmls132 [ <i>unc-54p::Q35::YFP</i> ]; gamEx20 [ <i>myo-3p::3xFLAG::αNAC::unc-54 3'UTR</i> (25 ng/μl), <i>myo-3p::3xFLAG::RRK/AAA-βNAC::unc-54 3'UTR</i> (25 ng/μl), <i>myo-2p::mCherry::unc-54 3'UTR</i> (2.5 ng/μl), DNA ladder (100 ng/μl)]       |
| DEU121 | rmls132 [ <i>unc-54p::Q35::YFP</i> ]; gamEx21 [ <i>myo-3p::3xFLAG::αNAC::unc-54 3'UTR</i> (25 ng/μl), <i>myo-3p::3xFLAG::ΔNβ-NAC::unc-54 3'UTR</i> (25 ng/μl), <i>myo-2p::mCherry::unc-54 3'UTR</i> (2.5 ng/μl), DNA ladder (100 ng/μl)]            |
| DEU122 | <i>marIs135</i> [ <i>unc-54p::FlucDM::EGFP</i> ]; gamEx22 [ <i>myo-3p::empty::unc-54 3'UTR</i> (50 ng/μl), <i>myo-2p::mCherry::unc-54 3'UTR</i> (2.5 ng/μl), DNA ladder (50 ng/μl)]                                                                 |
| DEU123 | <i>marIs135</i> [ <i>unc-54p::FlucDM::EGFP</i> ]; gamEx23 [ <i>myo-3p::3xFLAG::αNAC::unc-43 3'UTR</i> (25 ng/μl), <i>myo-3p::3xFLAG::βNAC::unc-54 3'UTR</i> (25 ng/μl), <i>myo-2p::mCherry::unc-54 3'UTR</i> (2.5 ng/μl), DNA ladder (50 ng/μl)]    |
| DEU124 | <i>marIs135</i> [ <i>unc-54p::FlucDM::EGFP</i> ]; gamEx24 [ <i>myo-3p::3xFLAG::αNAC::unc-54 3'UTR</i> (25 ng/μl), <i>myo-3p::3xFLAG::ΔNβ-NAC::unc-54 3'UTR</i> (25 ng/μl), <i>myo-2p::mCherry::unc-54 3'UTR</i> (2.5 ng/μl), DNA ladder (50 ng/μl)] |
